Effects of patient characteristics and comorbidities on temporal trends of low-flow, low-gradient aortic stenosis phenotypes

J. Sen<sup>1</sup>, T. Manning<sup>2</sup>, K. Innes-Jones<sup>2</sup>, C. Neil<sup>1</sup>, T.H. Marwick<sup>1</sup>

<sup>1</sup>Baker Heart and Diabetes Institute, Melbourne, Australia; <sup>2</sup>Western Health, Melbourne, Australia

Funding Acknowledgement: Type of funding source: None

**Background:** Aortic stenosis (AS) is a common primary heart valve disease in the elderly. Low-flow, low-gradient (LFLG) AS is an increasingly important phenotype.  
**Purpose:** To evaluate the temporal changes in incidence of severe AS phenotypes: paradoxical LFLG, classical LFLG and non-LFLG and explore risk factors that contribute to temporal trends.  
**Methods:** We analyzed 25,507 consecutive transthoracic echocardiograms over 6½ years between 2013 and 2019 divided into deciles. LFLG-AS was defined as mean transvalvular pressure gradient <40 mmHg and stroke volume index (SVi) <35 mL/m<sup>2</sup>, aortic valve area (AVA) <1 cm<sup>2</sup> or indexed AVA <0.6 cm<sup>2</sup>/m<sup>2</sup>, with either normal (paradoxical LFLG) or decreased (<40%; classical LFLG) left ventricular ejection fraction. Trends and associations with patients characteristics and comorbidities were assessed over time in deciles.  
**Results:** Of 891 cases that fulfilled severe AS criteria, there were 536 cases of LFLG-AS (85 classical and 451 paradoxical LFLG-AS). There

was a statistically significant increase in incidence of paradoxical LFLG-AS between each time interval (p<0.0001), while significant reduction in incidence of non-LFLG-AS (p=0.009) that was not seen with classical LFLG-AS (p=0.7) (Figure). More comprehensive echocardiographic assessment of relevant parameters over time assisted with identification of LFLG-AS cases. Intrinsic patient factors such as age and E/e' contributed towards the increasing trend of paradoxical LFLG-AS. There was a rising population aged over 70 years (p=0.01). Multivariate logistic regression analysis showed that age, sex, E/e', obesity, atrial fibrillation and heart rate were potential risk factors responsible for temporal trend towards rising paradoxical LFLG-AS incidence. There was also a gradual increase in number of patients with low transvalvular flow rate (<200mL/s) over time (p=0.04).  
**Conclusion:** The incidence of paradoxical LFLG-AS is rising in a hospital echocardiogram service. The parallel increase in LV filling pressure and age in AS patients suggests the increment in LFLG-AS is related to changes to the LV myocardium.

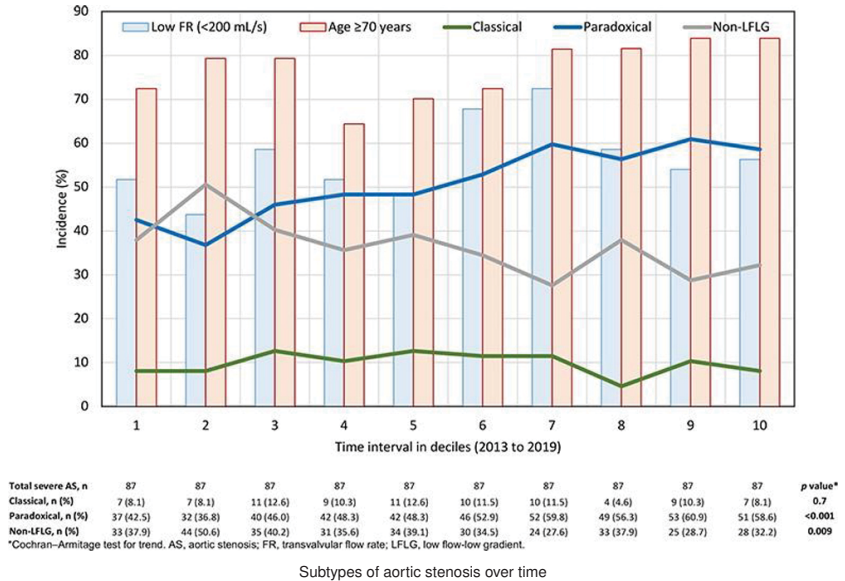

Source: http://academic.oup.com/eurheartj/article-pdf/41/Supplement_2/ehaa946.1890/34521566/ehaa946.1890.pdf
